# Supplementary material for: An Integrated Perspective on Spatio-Temporal Attention and Infant Language Acquisition
Source: MDPI journal article supplement (doi:10.3390/ijerph18041592), 2021-02-08
Supplement: s1 [file s1]

## Supplementary materials

The sample analyzed in experiment 1 is part of a larger cohort of infants participating in our study. The original sample included 48 infants (23 F, mean age in days = 120, SD = 14). Twenty-four infants were excluded because they show less than three valid trials per condition. Figure S1 shows the descriptive statistics of saccade latency (in ms) for the remaining 24 subjects: a) by condition, b) by position of S2 (i.e., left and right of S1) and c) by subject. The results overlap those presented in experiment 1.

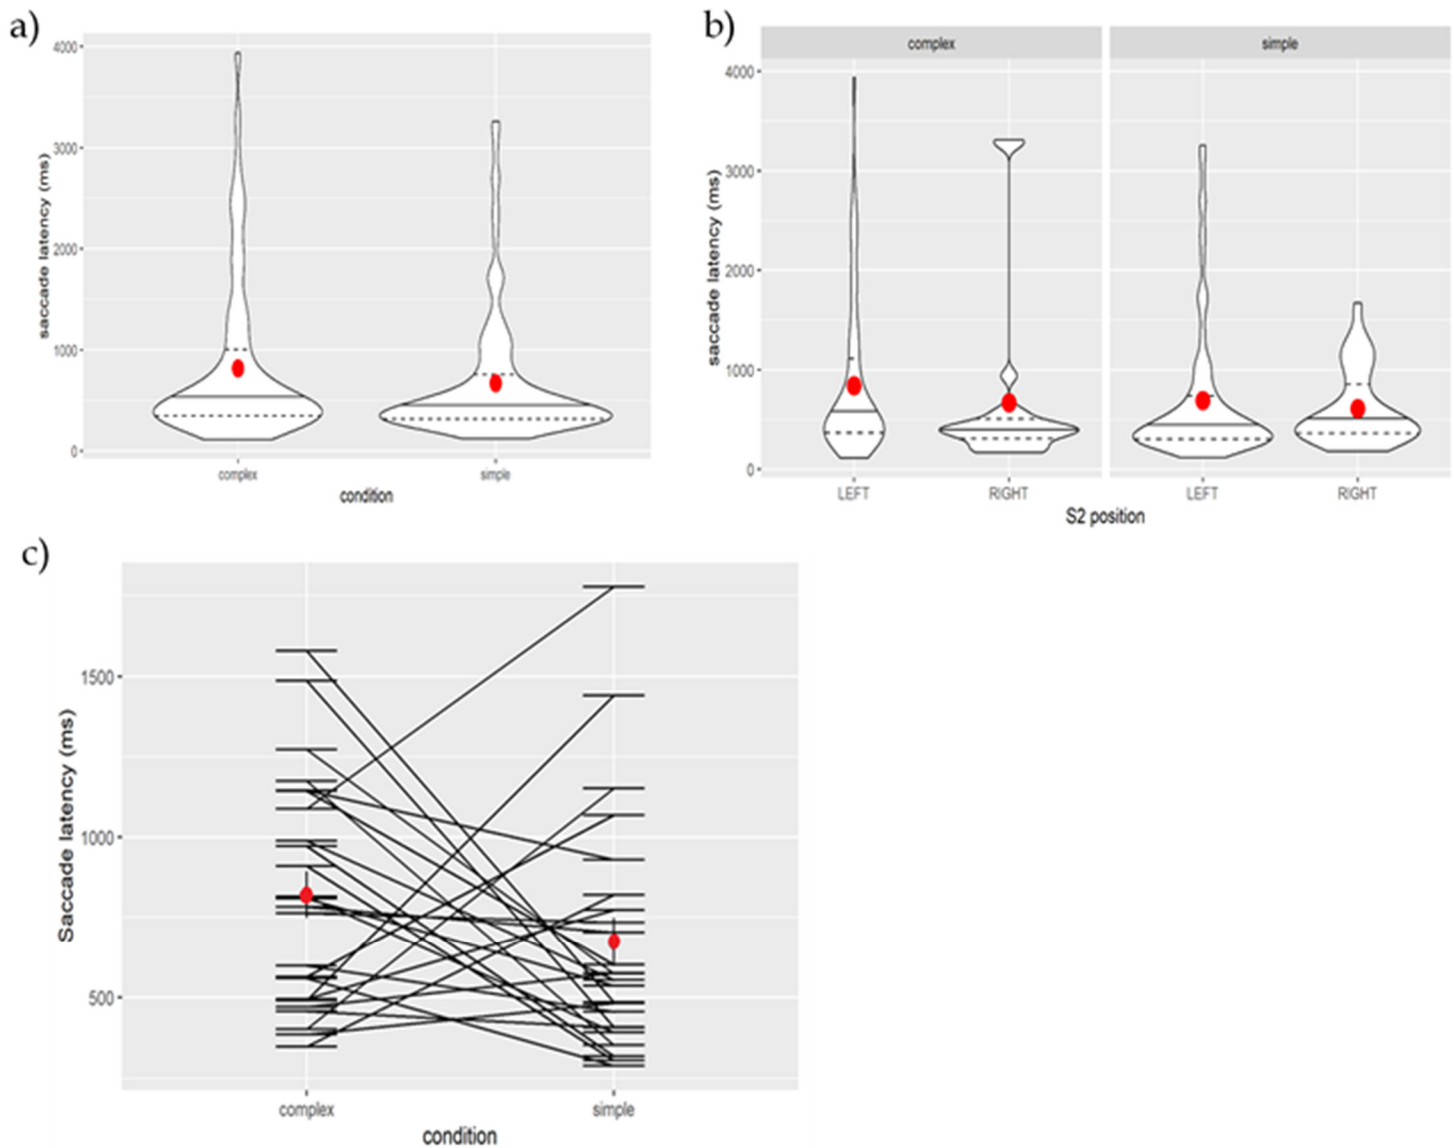

**Figure S1.** Descriptive statistics of saccade latency (in ms) for the complete sample of 24 subjects participating in the experiment 1.
